# Supplementary material
Source: Springer Nature journal article supplement (https://www.springermedizin.de/resource/supplementary/13054_2011_499_MOESM3_ESM.pdf/9708618)

**WEn(s4)**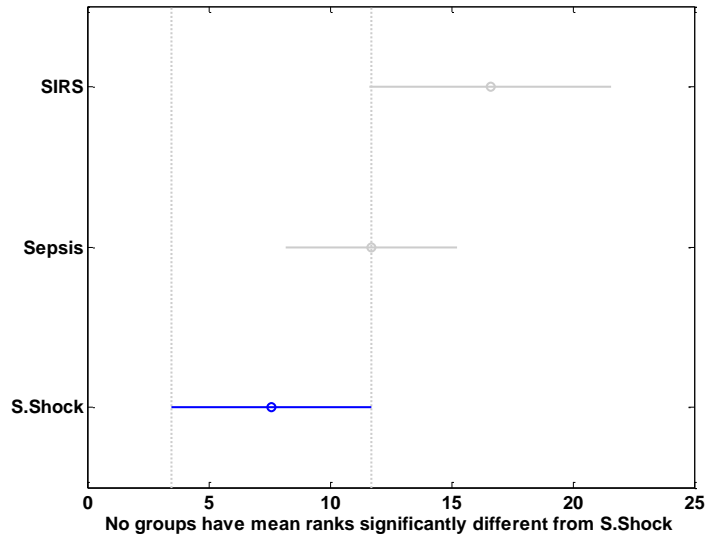**WEn(s5)**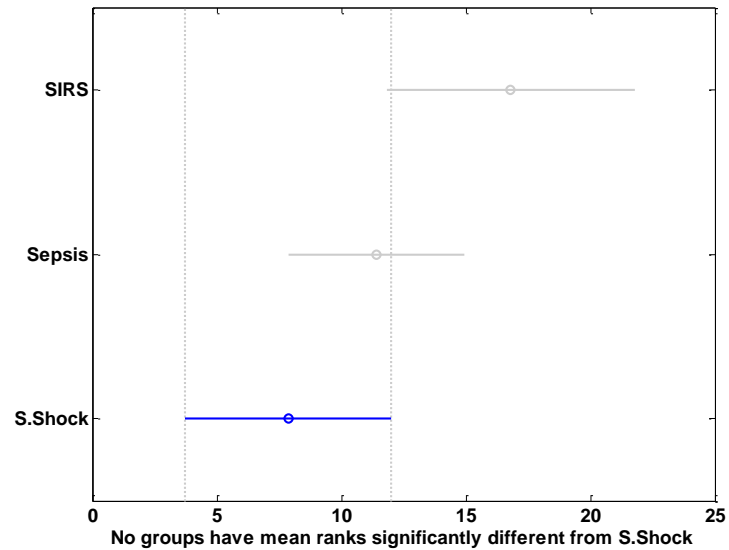**A**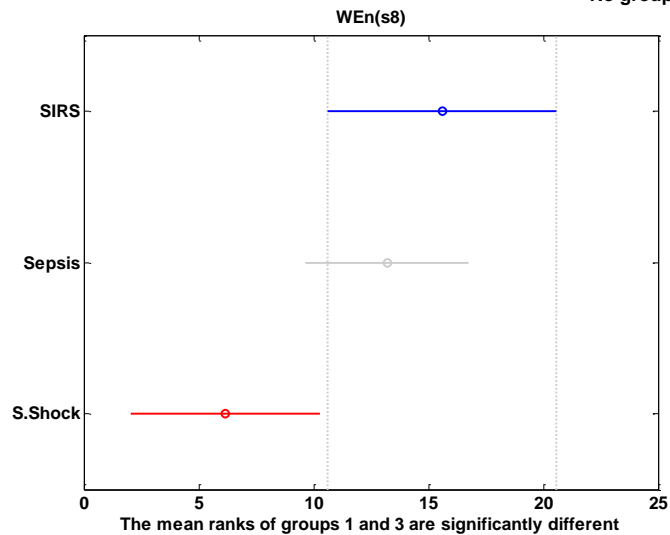**B****C**

Supplement: MOESM3 [file 9708618]
